# Supplementary material for: Biologically Inspired Approaches to Computer Security
Source: MDPI journal article supplement (doi:10.3390/v16040624), 2002-01-01
Supplement: s1 [file s1]

**Table S1. Disease Activity Index (DAI)**

| <b>Group</b>                      | <b>Mouse</b> | <b>DAI (Day 7)</b> |
|-----------------------------------|--------------|--------------------|
| <b>DSS</b>                        | A1           | 3                  |
|                                   | A2           | 2                  |
|                                   | A3           | 3                  |
|                                   | A4           | 3                  |
|                                   | A5           | 5                  |
|                                   | B1           | 4                  |
|                                   | B2           | 2                  |
|                                   | B3           | 2                  |
|                                   | B4           | 3                  |
|                                   | B5           | 5                  |
| <b>DSS+EBV DNA</b>                | 856          | 6                  |
|                                   | A2           | 7                  |
|                                   | A3           | 5                  |
|                                   | A4           | 7                  |
|                                   | A5           | 7                  |
|                                   | B1           | 2                  |
|                                   | B2           | 7                  |
|                                   | B3           | 6                  |
|                                   | B4           | 4                  |
|                                   | B5           | 5                  |
| <b>DSS+TLR3 Inhibitor</b>         | A1           | 4                  |
|                                   | A2           | 1                  |
|                                   | A3           | 3                  |
|                                   | A4           | 8                  |
|                                   | A5           | 6                  |
|                                   | B1           | 8                  |
|                                   | B2           | 7                  |
|                                   | B3           | 8                  |
|                                   | B4           | 4                  |
|                                   | B5           | 4                  |
| <b>DSS+EBV DNA+TLR3 Inhibitor</b> | A1           | 4                  |
|                                   | A2           | 6                  |
|                                   | A3           | 2                  |
|                                   | A4           | 5                  |
|                                   | A5           | 2                  |
|                                   | B1           | 5                  |
|                                   | B2           | 6                  |
|                                   | B3           | 1                  |
|                                   | B4           | 6                  |
|                                   | B5           | 1                  |
| <b>DSS+TLR7 Inhibitor</b>         | A1           | 8                  |
|                                   | A2           | 7                  |
|                                   | A3           | 7                  |

|                                   |     |    |
|-----------------------------------|-----|----|
|                                   | A4  | 3  |
|                                   | A5  | 6  |
|                                   | B1  | 3  |
|                                   | B2  | 2  |
|                                   | B3  | 9  |
|                                   | B4  | 2  |
|                                   | B5  | 6  |
| <b>DSS+EBV DNA+TLR7 Inhibitor</b> | A1  | 6  |
|                                   | A2  | 6  |
|                                   | A3  | 6  |
|                                   | A4  | 4  |
|                                   | A5  | 0  |
|                                   | B1  | 3  |
|                                   | B2  | 1  |
|                                   | B3  | 3  |
|                                   | B4  | 4  |
|                                   | B5  | 5  |
| <b>DSS+TLR9 Inhibitor</b>         | A1  | 6  |
|                                   | A2  | 0  |
|                                   | A3  | 6  |
|                                   | A4  | 7  |
|                                   | A5  | 4  |
|                                   | B1  | 9  |
|                                   | B2  | 2  |
|                                   | B3  | 4  |
|                                   | B4  | 4  |
|                                   | B5  | 5  |
| <b>DSS+EBV DNA+TLR9 Inhibitor</b> | A1  | 0  |
|                                   | A2  | 2  |
|                                   | A3  | 0  |
|                                   | A4  | 2  |
|                                   | A5  | 0  |
|                                   | B1  | 4  |
|                                   | B2  | 3  |
|                                   | B3  | 0  |
|                                   | B4  | 3  |
|                                   | B5  | 0  |
| <b>DSS+TLR3,7,9 Inhibitors</b>    | 1   | 4  |
|                                   | 2   | 6  |
|                                   | 3   | 5  |
|                                   | 4   | 2  |
|                                   | 5   | 6  |
|                                   | 850 | 10 |
|                                   | 849 | 6  |
|                                   | 878 | 5  |
|                                   | 847 | 4  |

|                                            |     |   |
|--------------------------------------------|-----|---|
|                                            | 846 | 2 |
| <b>DSS+EBV DNA+TLR3,7,9<br/>Inhibitors</b> | 1   | 1 |
|                                            | 2   | 1 |
|                                            | 3   | 0 |
|                                            | 4   | 3 |
|                                            | 5   | 2 |
|                                            | 876 | 6 |
|                                            | 844 | 5 |
|                                            | 843 | 6 |
|                                            | 842 | 2 |
|                                            | 874 | 0 |

**Table S2. Colon Length**

| <b>Group</b>                      | <b>Mouse</b> | <b>Colon Length (cm)</b> |
|-----------------------------------|--------------|--------------------------|
| <b>DSS</b>                        | A1           | 7                        |
|                                   | A2           | 7.5                      |
|                                   | A3           | 7                        |
|                                   | A4           | 10                       |
|                                   | A5           | 6.5                      |
|                                   | B1           | 7.5                      |
|                                   | B2           | 7.5                      |
|                                   | B3           | 8                        |
|                                   | B4           | 8                        |
|                                   | B5           | 7.5                      |
| <b>DSS+EBV DNA</b>                | 856          | 5.5                      |
|                                   | A2           | 7.5                      |
|                                   | A3           | 7                        |
|                                   | A4           | 7                        |
|                                   | A5           | 7                        |
|                                   | B1           | 6.8                      |
|                                   | B2           | 7                        |
|                                   | B3           | 7.2                      |
|                                   | B4           | 7                        |
|                                   | B5           | 7                        |
| <b>DSS+TLR3 Inhibitor</b>         | A1           | 9                        |
|                                   | A2           | 6.5                      |
|                                   | A3           | 8                        |
|                                   | A4           | 7                        |
|                                   | A5           | 7                        |
|                                   | B1           | 7                        |
|                                   | B2           | 8                        |
|                                   | B3           | 8.5                      |
|                                   | B4           | 7                        |
|                                   | B5           | 8                        |
| <b>DSS+EBV DNA+TLR3 Inhibitor</b> | A1           | 6.5                      |
|                                   | A2           | 6                        |
|                                   | A3           | 7                        |
|                                   | A4           | 7                        |
|                                   | A5           | 7                        |
|                                   | B1           | 7.5                      |
|                                   | B2           | 6.5                      |
|                                   | B3           | 7                        |
|                                   | B4           | 6.5                      |
|                                   | B5           | 7.5                      |
| <b>DSS+TLR7 Inhibitor</b>         | A1           | 7.7                      |
|                                   | A2           | 8                        |
|                                   | A3           | 7.2                      |

|                                   |     |     |
|-----------------------------------|-----|-----|
|                                   | A4  | 6.5 |
|                                   | A5  | 8   |
|                                   | B1  | 8.3 |
|                                   | B2  | 6.8 |
|                                   | B3  | 6.5 |
|                                   | B4  | 8.3 |
|                                   | B5  | 8   |
| <b>DSS+EBV DNA+TLR7 Inhibitor</b> | A1  | 7.3 |
|                                   | A2  | 7   |
|                                   | A3  | 7.5 |
|                                   | A4  | 6.5 |
|                                   | A5  | 7.5 |
|                                   | B1  | 7   |
|                                   | B2  | 7.5 |
|                                   | B3  | 9   |
|                                   | B4  | 6.5 |
|                                   | B5  | 6.3 |
| <b>DSS+TLR9 Inhibitor</b>         | A1  | 7.5 |
|                                   | A2  | 7.5 |
|                                   | A3  | 7   |
|                                   | A4  | 7   |
|                                   | A5  | 7   |
|                                   | B1  | 9   |
|                                   | B2  | 8   |
|                                   | B3  | 7.5 |
|                                   | B4  | 7   |
|                                   | B5  | 8.5 |
| <b>DSS+EBV DNA+TLR9 Inhibitor</b> | A1  | 7   |
|                                   | A2  | 8   |
|                                   | A3  | 8   |
|                                   | A4  | 9   |
|                                   | A5  | 7.5 |
|                                   | B1  | 7   |
|                                   | B2  | 8   |
|                                   | B3  | 7.7 |
|                                   | B4  | 7.5 |
|                                   | B5  | 7.5 |
| <b>DSS+TLR3,7,9 Inhibitors</b>    | 1   | 7   |
|                                   | 2   | 7.5 |
|                                   | 3   | 7.5 |
|                                   | 4   | 8   |
|                                   | 5   | 7   |
|                                   | 850 | 7.5 |
|                                   | 849 | 7   |
|                                   | 878 | 7.5 |
|                                   | 847 | 6   |

|                                            |     |    |
|--------------------------------------------|-----|----|
|                                            | 846 | 6  |
| <b>DSS+EBV DNA+TLR3,7,9<br/>Inhibitors</b> | 1   | 10 |
|                                            | 2   | 10 |
|                                            | 3   | 8  |
|                                            | 4   | 9  |
|                                            | 5   | 9  |
|                                            | 876 | 8  |
|                                            | 844 | 6  |
|                                            | 843 | 7  |
|                                            | 842 | 6  |
|                                            | 874 | 9  |

**Table S3. Histological Damage**

| <b>Group</b>                      | <b>Mouse</b> | <b>Histological Damage</b> |
|-----------------------------------|--------------|----------------------------|
| <b>DSS</b>                        | A1           | 4                          |
|                                   | A2           | 6                          |
|                                   | A3           | 5                          |
|                                   | A4           | 4                          |
|                                   | A5           | 3                          |
|                                   | B1           | 4                          |
|                                   | B2           | 7                          |
|                                   | B3           | 7                          |
|                                   | B4           | 4                          |
|                                   | B5           | 3                          |
| <b>DSS+EBV DNA</b>                | 856          | 10                         |
|                                   | A2           | 8                          |
|                                   | A3           | 5                          |
|                                   | A4           | 4                          |
|                                   | A5           | 5                          |
|                                   | B1           | 6                          |
|                                   | B2           | 8                          |
|                                   | B3           | 6                          |
|                                   | B4           | 7                          |
|                                   | B5           | 8                          |
| <b>DSS+TLR3 Inhibitor</b>         | A1           | 8                          |
|                                   | A2           | 8                          |
|                                   | A3           | 5                          |
|                                   | A4           | 10                         |
|                                   | A5           | 6                          |
|                                   | B1           | 4                          |
|                                   | B2           | 4                          |
|                                   | B3           | 6                          |
|                                   | B4           | 6                          |
|                                   | B5           | 6                          |
| <b>DSS+EBV DNA+TLR3 Inhibitor</b> | A1           | 2                          |
|                                   | A2           | 2                          |
|                                   | A3           | 5                          |
|                                   | A4           | 2                          |
|                                   | A5           | 2                          |
|                                   | B1           | 5                          |
|                                   | B2           | 5                          |
|                                   | B3           | 5                          |
|                                   | B4           | 6                          |
|                                   | B5           | 3                          |
| <b>DSS+TLR7 Inhibitor</b>         | A1           | 9                          |
|                                   | A2           | 8                          |
|                                   | A3           | 9                          |

|                                            |     |    |
|--------------------------------------------|-----|----|
|                                            | A4  | 7  |
|                                            | A5  | 8  |
|                                            | B1  | 10 |
|                                            | B2  | 9  |
|                                            | B3  | 8  |
|                                            | B4  | 9  |
|                                            | B5  | 9  |
| <b>DSS+EBV DNA+TLR7<br/>Inhibitor</b>      | A1  | 5  |
|                                            | A2  | 6  |
|                                            | A4  | 6  |
|                                            | A5  | 4  |
|                                            | B1  | 5  |
|                                            | B2  | 5  |
|                                            | B4  | 4  |
|                                            | B5  | 4  |
| <b>DSS+TLR9 Inhibitor</b>                  | A1  | 8  |
|                                            | A3  | 8  |
|                                            | A4  | 10 |
|                                            | B1  | 9  |
|                                            | B2  | 8  |
|                                            | B3  | 8  |
|                                            | B4  | 8  |
|                                            | B5  | 8  |
| <b>DSS+EBV DNA+TLR9<br/>Inhibitor</b>      | A1  | 6  |
|                                            | A2  | 5  |
|                                            | A3  | 4  |
|                                            | A4  | 3  |
|                                            | A5  | 5  |
|                                            | B1  | 4  |
|                                            | B2  | 4  |
|                                            | B3  | 8  |
|                                            | B4  | 5  |
|                                            | B5  | 4  |
| <b>DSS+TLR3,7,9 Inhibitors</b>             | 1   | 7  |
|                                            | 2   | 9  |
|                                            | 3   | 7  |
|                                            | 4   | 7  |
|                                            | 850 | 8  |
|                                            | 849 | 10 |
|                                            | 878 | 6  |
|                                            | 847 | 5  |
|                                            | 846 | 10 |
|                                            |     |    |
| <b>DSS+EBV DNA+TLR3,7,9<br/>Inhibitors</b> | 1   | 3  |
|                                            | 2   | 4  |
|                                            | 3   | 4  |



|  |     |   |
|--|-----|---|
|  | 4   | 4 |
|  | 5   | 5 |
|  | 876 | 5 |
|  | 844 | 6 |
|  | 843 | 7 |
|  | 842 | 7 |
|  | 874 | 5 |
